# Supplementary material for: Prediction of Pubertal Mandibular Growth in Males with Class II Malocclusion by Utilizing Machine Learning
Source: MDPI journal article supplement (doi:10.3390/diagnostics13162713), 2023-08-21
Supplement: s1 [file s1]

**Supplementary Table S1.** Cephalometric variables and their definitions.

| Category                   | Measurements                           | Definitions                                                                                                                                            |
|----------------------------|----------------------------------------|--------------------------------------------------------------------------------------------------------------------------------------------------------|
| Maxilla to Cranial Base    | SNA (°)                                | The angle formed by connecting sella, nasion, and A-point                                                                                              |
|                            | SN-Palatal Plane (°)                   | The angle formed from the intersection of sella-nasion line and a line drawn connecting anterior nasal spine to posterior nasal spine                  |
|                            | SN-Occlusal Plane (°)                  | The angle formed from sella-nasion and occlusal plane                                                                                                  |
|                            | A-N Perpendicular (mm)                 | The linear distance from A point to the nasion perpendicular.                                                                                          |
| Mandible to Cranial Base   | SNB (°)                                | The angle formed by connecting sella, nasion, and B-point                                                                                              |
|                            | SNPog (°)                              | The angle formed by connecting sella, nasion, and pogonion                                                                                             |
|                            | FMA: MP-FH (°)                         | The angle formed from the intersection of porion-orbitale line and a line drawn connecting gonion to gnathion                                          |
|                            | SN-MP (°)                              | The angle formed from the intersection of sella-nasion line and a line drawn connecting gonion to gnathion                                             |
|                            | Mandibular Plane to Occlusal Plane (°) | The angle formed by mandibular plane and occlusal plane                                                                                                |
|                            | B-N Perpendicular (mm)                 | The linear distance from B point to nasion perpendicular                                                                                               |
|                            | Pog-N Perpendicular (mm)               | The linear distance from pogonion to nasion perpendicular                                                                                              |
|                            | Y-Axis: SGn-SN (°)                     | The angle formed by connecting nasion, sella, and gnathion                                                                                             |
| Maxilla to Mandible        | ANB (°)                                | The difference between SNA and SNB                                                                                                                     |
|                            | Palatal-Mandibular Angle (PP-MP) (°)   | The angle formed from palatal plane and mandibular plane                                                                                               |
|                            | Wits Appraisal (mm)                    | The distance between A point to occlusal plane and B point to occlusal plane                                                                           |
|                            | Maxillary Length: ANS-PNS (mm)         | The linear measurement between anterior nasal spine and posterior nasal spine                                                                          |
|                            | Mandibular Length: Co-Gn (mm)          | The linear measurement between condylion and gnathion                                                                                                  |
| Cranial Base               | Cranial Base Flexure Angle: Ba-S-N (°) | The angle formed by connecting basion, sella, and nasion                                                                                               |
| Upper Incisors to Maxilla  | U1-SN (°)                              | The angle formed from a line connecting sella to nasion and a line connecting the upper incisor incisal tip to the root apex                           |
|                            | U1-NA (°)                              | The angle formed from a line connecting nasion to A-point and a line connecting the upper incisor incisal tip to the root apex                         |
|                            | U1-NA (mm)                             | The linear measurement from the labial surface of the upper incisor to the line connecting nasion to A-point                                           |
|                            | U1-Palatal Plane (°)                   | The angle formed by the position of maxillary incisor to palatal plane                                                                                 |
|                            | U1 Protrusion (U1-APog) (mm)           | The distance from maxillary incisor to the A point-pogonion reference line                                                                             |
| Lower Incisors to Mandible | L1-MP (°)                              | The angle formed from a line connecting the lower incisor incisal tip to the root apex and a line connecting gonion to gnathion                        |
|                            | L1-NB (°)                              | The angle formed from a line connecting the lower incisor incisal tip to the root apex and a line connecting nasion to B-point                         |
|                            | L1-NB (mm)                             | The linear measurement from the labial surface of the lower incisor incisal to the line connecting nasion to B-point                                   |
|                            | L1 Protrusion (L1-APog) (mm)           | The distance from mandibular incisor to the A point-pogonion reference line                                                                            |
| Incisors to Each Other     | Interincisal Angle (°)                 | The angle formed from a line connecting the lower incisor incisal tip to the apex and a line connecting the upper incisor incisal tip to the root apex |
|                            | Overjet (mm)                           | The horizontal distance from maxillary incisor tip to mandibular incisor tip                                                                           |
|                            | Overbite (mm)                          | The vertical distance from maxillary incisor tip to mandibular incisor tip                                                                             |

|         |                                            |                                                                                                     |
|---------|--------------------------------------------|-----------------------------------------------------------------------------------------------------|
|         | Hard Tissue Upper Face Height: N-ANS (mm)  | The linear measurement between nasion and anterior nasal spine                                      |
|         | Hard Tissue Lower Face Height: ANS-Me (mm) | The linear measurement between anterior nasal spine and menton                                      |
|         | UFH (N-ANS/(N-ANS+ANS-Me)) (%)             | The ratio of the upper face height to facial height                                                 |
|         | LFH (ANS-Me/(N-ANS+ANS-Me)) (%)            | The ratio of lower face height to facial height                                                     |
|         | Posterior Face Height: Ar-Go (mm)          | The linear measurement between articulare and gonion                                                |
|         | PFH:AFH (Co-Go:N-Me) (%)                   | The ratio of posterior facial height to anterior facial height                                      |
| Profile | Convexity: NA-APog (°)                     | The angle formed by connecting nasion, A-point, and pogonion                                        |
|         | Facial Angle: FH-NPog (°)                  | The angle formed from a line connecting porion to orbitale and a line connecting nasion to pogonion |

**Supplementary Table S2.** Intra-examiner repeatability of the measurements.

| Measurements                           | Mean  | SD   | P-value | ICC  |
|----------------------------------------|-------|------|---------|------|
| SNA (°)                                | 0.06  | 0.77 | 0.81    | 0.96 |
| SN-Palatal Plane (°)                   | -0.70 | 0.70 | 0.01    | 0.95 |
| SN-Occlusal Plane (°)                  | -0.32 | 1.93 | 0.61    | 0.73 |
| A-N Perpendicular (mm)                 | 0.15  | 1.72 | 0.79    | 0.93 |
| SNB (°)                                | 0.11  | 0.73 | 0.65    | 0.95 |
| SNPog (°)                              | 0.07  | 0.96 | 0.82    | 0.89 |
| FMA: MP-FH (°)                         | -0.01 | 0.99 | 0.98    | 0.98 |
| SN – MP (°)                            | -0.36 | 1.58 | 0.49    | 0.94 |
| Mandibular Plane to Occlusal Plane (°) | 0.33  | 1.86 | 0.59    | 0.88 |
| B-N Perpendicular (mm)                 | -0.12 | 2.57 | 0.89    | 0.84 |
| Pog-N Perpendicular (mm)               | -0.24 | 2.75 | 0.79    | 0.91 |
| Y-Axis (SGn-SN) (°)                    | -0.14 | 0.56 | 0.45    | 0.98 |
| ANB (°)                                | -0.05 | 0.93 | 0.87    | 0.81 |
| Palatal-Mandibular Angle (PP-MP) (°)   | 0.72  | 1.28 | 0.11    | 0.97 |
| Wits Appraisal (mm)                    | 0.29  | 1.69 | 0.60    | 0.90 |
| Maxillary length (ANS-PNS) (mm)        | 0.79  | 2.40 | 0.33    | 0.96 |
| Mandibular length (Co-Gn) (mm)         | -1.90 | 4.80 | 0.24    | 0.97 |
| Cranial Base Flexure Angle: Ba-S-N (°) | 0.53  | 1.11 | 0.17    | 0.97 |
| U1 – SN (°)                            | 1.45  | 2.31 | 0.08    | 0.96 |
| U1 – NA (°)                            | 1.39  | 2.70 | 0.14    | 0.94 |
| U1 - NA (mm)                           | 0.22  | 1.22 | 0.58    | 0.90 |
| U1 - Palatal Plane (°)                 | 0.75  | 2.07 | 0.28    | 0.98 |
| U1 Protrusion (U1-APog) (mm)           | 0.25  | 0.67 | 0.27    | 0.98 |
| L1 – MP (°)                            | 2.01  | 3.90 | 0.14    | 0.38 |
| L1 – NB (°)                            | 1.85  | 4.18 | 0.20    | 0.78 |
| L1 - NB (mm)                           | 0.44  | 0.65 | 0.06    | 0.96 |
| L1 Protrusion (L1-APog) (mm)           | 0.50  | 0.71 | 0.05    | 0.97 |
| Interincisal Angle (°)                 | -2.71 | 5.35 | 0.14    | 0.91 |
| Overjet (mm)                           | -0.26 | 0.44 | 0.09    | 0.99 |

|                                             |       |      |      |      |
|---------------------------------------------|-------|------|------|------|
| Overbite (mm)                               | -0.04 | 1.09 | 0.91 | 0.86 |
| Hard Tissue Upper Face Height (N-ANS) (mm)  | -0.73 | 1.37 | 0.13 | 0.99 |
| Hard Tissue lower Face Height (ANS-Me) (mm) | -0.97 | 2.00 | 0.16 | 0.99 |
| UFH (N-ANS/(N-ANS+ANS-Me)) (%)              | 0.08  | 0.60 | 0.68 | 0.88 |
| LFH (ANS-Me/(N-ANS+ANS-Me)) (%)             | -0.08 | 0.60 | 0.68 | 0.88 |
| Posterior Face Height (Ar-Go) (mm)          | -0.81 | 2.34 | 0.30 | 0.94 |
| PFH:AFH (Co-Go : N-Me) (%)                  | -0.43 | 3.20 | 0.68 | 0.61 |
| Convexity (NA-APog) (°)                     | 0.06  | 2.50 | 0.94 | 0.81 |
| Facial Angle (FH-NPog) (°)                  | -0.19 | 1.28 | 0.65 | 0.90 |

**Supplementary Table S3.** The descriptive statistics of the cephalometric measurements at T1, T2, and T3, including mean, standard deviation, and minimum/maximum values.

| Measurements                           | T1     |      |        |        | T2     |      |        |        | T3     |      |        |        |
|----------------------------------------|--------|------|--------|--------|--------|------|--------|--------|--------|------|--------|--------|
|                                        | Mean   | SD   | Min    | Max    | Mean   | SD   | Min    | Max    | Mean   | SD   | Min    | Max    |
| SNA (°)                                | 81.50  | 3.42 | 73.50  | 89.50  | 81.98  | 3.38 | 75.20  | 91.50  | 82.26  | 3.52 | 73.60  | 93.10  |
| SN-Palatal Plane (°)                   | 6.81   | 3.39 | -2.40  | 14.50  | 6.72   | 3.34 | -2.40  | 14.70  | 6.47   | 3.45 | -1.60  | 14.50  |
| SN to Occlusal Plane (°)               | 16.31  | 3.92 | 6.70   | 25.10  | 14.60  | 4.26 | 4.00   | 26.40  | 13.51  | 4.18 | 1.90   | 26.20  |
| A-N Perpendicular (mm)                 | -1.20  | 3.69 | -15.60 | 7.70   | -1.17  | 3.75 | -12.20 | 9.90   | -1.09  | 4.35 | -14.10 | 10.70  |
| SNB (°)                                | 77.30  | 3.11 | 69.80  | 84.40  | 78.09  | 3.15 | 70.60  | 85.30  | 78.77  | 3.33 | 70.40  | 87.20  |
| SNPog (°)                              | 78.48  | 3.18 | 70.80  | 85.40  | 79.50  | 3.31 | 71.10  | 88.10  | 80.45  | 3.47 | 71.20  | 89.80  |
| FMA: MP-FH (°)                         | 26.73  | 4.84 | 16.80  | 42.60  | 26.31  | 4.94 | 14.20  | 40.60  | 25.45  | 5.24 | 12.70  | 38.20  |
| SN – MP (°)                            | 31.70  | 4.74 | 21.40  | 42.00  | 30.81  | 5.00 | 20.80  | 42.50  | 29.81  | 5.07 | 17.70  | 41.80  |
| Mandibular Plane to Occlusal Plane (°) | 16.37  | 3.70 | 8.40   | 25.90  | 17.06  | 4.08 | 6.70   | 29.50  | 17.08  | 4.34 | 4.50   | 28.50  |
| B-N Perpendicular (mm)                 | -8.84  | 5.51 | -27.40 | 4.60   | -8.56  | 5.79 | -24.40 | 10.60  | -7.93  | 6.85 | -23.10 | 10.20  |
| Pog-N Perpendicular (mm)               | -7.98  | 6.47 | -29.20 | 6.80   | -7.15  | 6.89 | -25.50 | 14.50  | -5.80  | 8.10 | -24.20 | 16.90  |
| Y-Axis (SGn-SN) (°)                    | 67.32  | 3.34 | 59.90  | 75.00  | 67.18  | 3.50 | 56.60  | 75.40  | 66.84  | 3.60 | 55.00  | 75.30  |
| ANB (°)                                | 4.19   | 1.92 | -0.80  | 11.10  | 3.89   | 1.85 | -0.30  | 8.50   | 3.48   | 2.02 | -1.00  | 8.00   |
| Palatal-Mandibular Angle (PP-MP) (°)   | 25.87  | 5.06 | 14.80  | 41.70  | 24.94  | 5.06 | 14.20  | 39.80  | 24.10  | 5.04 | 12.20  | 40.50  |
| Wits Appraisal (mm)                    | 1.82   | 2.57 | -5.00  | 8.50   | 2.18   | 2.71 | -5.30  | 10.10  | 2.16   | 2.73 | -5.30  | 9.20   |
| Maxillary length (ANS-PNS) (mm)        | 52.28  | 3.33 | 41.80  | 59.90  | 54.36  | 3.65 | 45.90  | 64.80  | 56.39  | 3.61 | 48.60  | 68.40  |
| Mandibular length (Co-Gn) (mm)         | 107.19 | 6.26 | 89.90  | 124.20 | 122.30 | 7.12 | 101.10 | 139.90 | 128.08 | 7.65 | 105.70 | 147.40 |
| Cranial Base Flexure Angle: Ba-S-N (°) | 128.49 | 5.19 | 110.80 | 141.30 | 128.51 | 5.15 | 115.90 | 138.80 | 128.14 | 5.32 | 113.40 | 140.00 |
| U1 – SN (°)                            | 103.24 | 8.35 | 83.30  | 124.30 | 103.23 | 8.67 | 79.60  | 123.40 | 103.19 | 8.88 | 76.30  | 122.40 |
| U1 – NA (°)                            | 21.74  | 8.43 | 2.40   | 43.80  | 21.25  | 8.88 | 0.50   | 45.30  | 20.94  | 8.77 | -0.50  | 43.30  |
| U1 - NA (mm)                           | 3.96   | 2.82 | -2.30  | 12.30  | 4.20   | 2.98 | -1.80  | 12.30  | 4.36   | 3.11 | -2.80  | 13.50  |
| U1 - Palatal Plane (°)                 | 110.05 | 7.31 | 92.90  | 133.80 | 109.95 | 7.95 | 90.50  | 131.20 | 109.67 | 7.97 | 86.90  | 132.90 |
| U1 Protrusion (U1-APog) (mm)           | 6.49   | 2.90 | -3.80  | 14.40  | 6.34   | 3.01 | -3.90  | 12.50  | 5.96   | 3.10 | -4.80  | 13.00  |

|                                                |        |           |        |        |        |           |        |        |        |           |        |        |
|------------------------------------------------|--------|-----------|--------|--------|--------|-----------|--------|--------|--------|-----------|--------|--------|
| L1 – MP (°)                                    | 94.86  | 6.06      | 78.00  | 112.20 | 94.97  | 5.90      | 78.10  | 111.70 | 94.70  | 6.33      | 75.10  | 111.50 |
| L1 – NB (°)                                    | 26.16  | 6.13      | 4.30   | 39.70  | 26.24  | 6.34      | 6.00   | 38.40  | 25.62  | 6.68      | 3.00   | 41.00  |
| L1 - NB (mm)                                   | 4.60   | 2.11      | -2.30  | 10.00  | 4.85   | 2.28      | -1.70  | 10.20  | 4.93   | 2.46      | -2.90  | 11.20  |
| L1 Protrusion (L1-APog)<br>(mm)                | 1.17   | 2.30      | -6.40  | 6.80   | 1.28   | 2.55      | -6.70  | 7.20   | 1.29   | 2.69      | -8.80  | 7.10   |
| Interincisal Angle (°)                         | 127.90 | 11.1<br>1 | 106.30 | 167.90 | 128.62 | 12.2<br>8 | 106.40 | 165.60 | 129.94 | 12.1<br>5 | 108.80 | 172.00 |
| Overjet (mm)                                   | 5.42   | 2.40      | 1.20   | 13.30  | 5.14   | 2.13      | 0.80   | 12.80  | 4.80   | 2.09      | 0.10   | 11.10  |
| Overbite (mm)                                  | 3.15   | 2.06      | -5.20  | 7.10   | 3.12   | 2.13      | -6.60  | 7.60   | 2.97   | 2.27      | -5.10  | 7.40   |
| Hard Tissue Upper Face<br>Height (N-ANS) (mm)  | 51.52  | 3.42      | 42.50  | 59.40  | 54.12  | 3.61      | 46.60  | 64.20  | 55.98  | 3.80      | 47.20  | 65.20  |
| Hard Tissue Lower Face<br>Height (ANS-Me) (mm) | 64.19  | 4.98      | 53.70  | 85.20  | 67.68  | 5.27      | 59.00  | 89.20  | 70.82  | 5.47      | 60.60  | 94.60  |
| UFH (N-ANS/(N-ANS+ANS-<br>Me)) (%)             | 44.57  | 1.98      | 40.40  | 50.00  | 44.46  | 1.90      | 39.40  | 48.70  | 44.18  | 1.98      | 39.20  | 48.30  |
| LFH (ANS-Me/(N-ANS+ANS-<br>Me)) (%)            | 55.50  | 2.04      | 50.00  | 61.40  | 55.54  | 1.90      | 51.30  | 60.60  | 55.82  | 1.98      | 51.70  | 60.80  |
| Posterior Face Height (Ar-Go)<br>(mm)          | 42.83  | 3.91      | 33.20  | 53.40  | 46.28  | 4.66      | 34.00  | 56.50  | 49.63  | 5.41      | 35.30  | 61.70  |
| PFH:AFH (Co-Go : N-Me) (%)                     | 54.75  | 3.53      | 45.40  | 62.70  | 55.35  | 4.05      | 45.30  | 66.10  | 56.48  | 3.74      | 48.10  | 66.60  |
| Convexity (NA-APog) (°)                        | 6.47   | 4.69      | -7.90  | 22.50  | 5.22   | 4.68      | -7.50  | 17.70  | 3.80   | 4.89      | -6.10  | 17.20  |
| Facial Angle (FH-NPog) (°)                     | 85.70  | 3.47      | 74.00  | 93.90  | 86.38  | 3.53      | 76.00  | 97.20  | 87.15  | 4.04      | 77.00  | 98.40  |
